# Supplementary material for: Carbon isotope fractionation during volatilization of chlorinated organic compounds
Source: Royal Society of Chemistry journal article supplement (doi:10.1039/d4ja00390j), 2025-01-01
Supplement: d4ja00390j1.pdf [file d4ja00390j1.pdf]

## Supplementary Information

### Carbon Isotope Fractionation during Volatilization of Chlorinated Organic Compounds

Lingling Zhang<sup>a,b,c</sup>, Yi Liu<sup>d,a</sup>, Xinyi Du<sup>a,b,c</sup>, Di Zhu<sup>e</sup>, Zhe Shi<sup>e</sup>, Mang Lin<sup>b,c</sup>, Biao Jin<sup>a,b,c\*</sup>

<sup>a</sup> State Key Laboratory of Advanced Environmental Technology, Guangzhou Institute of Geochemistry, Chinese Academy of Sciences, Guangzhou, 510640, China.

<sup>b</sup> CAS Center for Excellence in Deep Earth Science, Guangzhou, 510640, China.

<sup>c</sup> University of Chinese Academy of Sciences, Beijing, 100049, China.

<sup>d</sup> Shandong Vocational College of Light Industry, Zibo, 255300, China

<sup>e</sup> Suzhou Grand Energy Tech. Co. Ltd., Suzhou 215129, China

\* **Corresponding author:** *Biao Jin, jinbiao@gig.ac.cn*

†: The two authors contributed equally

Content:

Table:

Table S1. Physicochemical properties of the target compounds.

Table S2. Carbon isotope correlation parameters of chlorinated organic matter during volatilization.

Table S3. Comparison of the  $\delta^{13}\text{C}$  values of 1,2-dichloroethane, 1,1,2-trichloroethane, tetrachloroethane obtained by GC-IRMS and GC-IRIS (n=4).

Figure:

Figure S1. Variations on stable carbon isotope values with time during volatilization of dichloromethane (A), chlorodibromomethane (B) and bromodichloromethane (C).

Figure S2. Variations on stable carbon isotope values with time during volatilization of 1,2-dichloroethane (A), 1,1,2-trichloroethane (B) and 1,1,2,2-tetrachloroethane (C).

Figure S3. Variations on stable carbon isotope values with time during volatilization of 1,2-dichloroethylene (A), trichloroethylene, (B) and tetrachloroethene (C).

Figure S4. Variations on stable carbon isotope values with time during volatilization of chlorobenzene (A), o-dichlorobenzene (B) and trichlorobenzene (C).

Table:

Table S1. Properties of the target compounds. Physicochemical data from [PubChem](#).

| compound                  | molecular structure                                                                 | molar mass (g/mol) | boiling point (°C) | vapour pressure (kPa) |
|---------------------------|-------------------------------------------------------------------------------------|--------------------|--------------------|-----------------------|
| dichloromethane           | 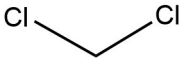   | 84.93              | 40                 | 47.40                 |
| chlorodibromomethane      |    | 208.28             | 121                | 6.09                  |
| bromodichloromethane      |   | 163.83             | 90                 | 6.60                  |
| 1,2-dichloroethane        |  | 98.96              | 83.5               | 8.70                  |
| 1,1,2-trichloroethane     |  | 133.40             | 113                | 2.50                  |
| 1,1,2,2-tetrachloroethane |  | 167.80             | 146                | 0.60                  |
| 1,2-dichloroethylene      |  | 96.94              | 55                 | 24.00                 |
| trichloroethylene         |  | 131.38             | 87                 | 7.80                  |

| compound          | molecular structure                                                                 | molar mass<br>(g/mol) | boiling point<br>(°C) | vapour pressure<br>(kPa) |
|-------------------|-------------------------------------------------------------------------------------|-----------------------|-----------------------|--------------------------|
| tetrachloroethene | 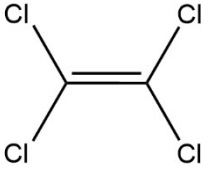   | 165.80                | 121                   | 1.90                     |
| chlorobenzene     |    | 112.55                | 132                   | 1.20                     |
| o-dichlorobenzene |   | 147.00                | 180                   | 0.20                     |
| trichlorobenzene  |  | 181.40                | 213                   | 0.03                     |

Table S2. Carbon isotope correlation parameters of chlorinated organic matter during volatilization.

| compound                  | $\delta^{13}\text{C}$ (‰) |                   | enrichment factor (‰) |
|---------------------------|---------------------------|-------------------|-----------------------|
|                           | f = 100%                  | f = 1%            |                       |
| dichloromethane           | $-51.18 \pm 0.34$         | $-55.19 \pm 0.51$ | $0.10 \pm 0.04$       |
| chlorodibromomethane      | $-48.43 \pm 0.21$         | $-50.70 \pm 0.35$ | $0.61 \pm 0.02$       |
| bromodichloromethane      | $-50.00 \pm 0.14$         | $-54.60 \pm 0.39$ | $1.11 \pm 0.05$       |
| 1,2-dichloroethane        | $-27.76 \pm 0.18$         | $-29.59 \pm 0.38$ | $0.40 \pm 0.02$       |
| 1,1,2-trichloroethane     | $-34.83 \pm 0.48$         | $-36.74 \pm 0.33$ | $0.44 \pm 0.04$       |
| 1,1,2,2-tetrachloroethane | $-19.64 \pm 0.54$         | $-22.34 \pm 0.17$ | $0.69 \pm 0.04$       |
| 1,2-dichloroethylene      | $-23.35 \pm 0.20$         | $-25.10 \pm 0.37$ | $0.41 \pm 0.03$       |
| trichloroethylene         | $-23.74 \pm 0.25$         | $-26.57 \pm 0.53$ | $0.71 \pm 0.03$       |
| tetrachloroethene         | $-29.79 \pm 0.38$         | $-32.17 \pm 0.45$ | $0.57 \pm 0.05$       |
| chlorobenzene             | $-25.36 \pm 0.23$         | $-27.45 \pm 0.28$ | $0.46 \pm 0.04$       |

| compound          | $\delta^{13}\text{C}$ (‰) |                   | enrichment factor (‰) |
|-------------------|---------------------------|-------------------|-----------------------|
|                   | f = 100%                  | f = 1%            |                       |
| o-dichlorobenzene | $-24.69 \pm 0.37$         | $-26.46 \pm 0.35$ | $0.42 \pm 0.04$       |
| trichlorobenzene  | $-28.18 \pm 0.22$         | $-31.19 \pm 0.33$ | $0.81 \pm 0.07$       |

Table S3. Comparison of the  $\delta^{13}\text{C}$  values of 1,2-dichloroethane, 1,1,2-trichloroethane, tetrachloroethane obtained by GC-IRMS and GC-IRIS (n=4).

| compound              | GC-IRMS                      |                       | GC-IRIS                      |                       |
|-----------------------|------------------------------|-----------------------|------------------------------|-----------------------|
|                       | $\delta^{13}\text{C}$<br>(‰) | STDV<br>(1 $\sigma$ ) | $\delta^{13}\text{C}$<br>(‰) | STDV<br>(1 $\sigma$ ) |
| 1,2-dichloroethane    | -27.13                       | 0.59                  | -27.42                       | 0.09                  |
| 1,1,2-trichloroethane | -34.24                       | 0.41                  | -34.71                       | 0.41                  |
| tetrachloroethane     | -20.33                       | 0.21                  | -20.01                       | 0.21                  |

**Carbon CSIA using GC-IRMS.** The GC-IRMS includes a Trace 1310 GC (Thermo Scientific, USA) equipped with capillary column (DB-5MS, 30 m $\times$ 0.25 mm $\times$ 0.25  $\mu\text{m}$ , Agilent, USA) and split/splitless injector, a GC IsoLink operated at 1030  $^{\circ}\text{C}$  and an isotope ratio mass spectrometer (DELTA V Advantage, Thermo Scientific, USA).  $^{13}\text{C}/^{12}\text{C}$  isotopic ratios are reported as  $\delta^{13}\text{C}$  values by referencing to the VPDB standard (see Eq 1). A software, Isodat, was utilized for data extraction and processing.

Figure:

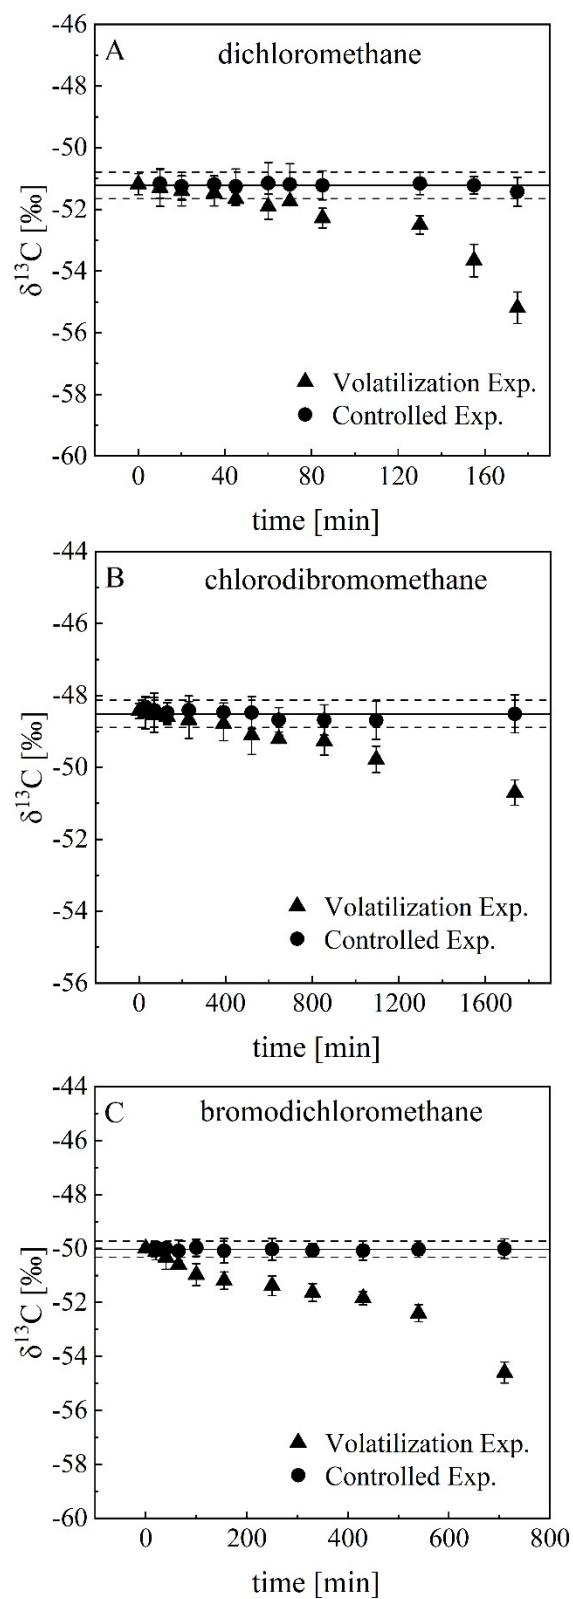



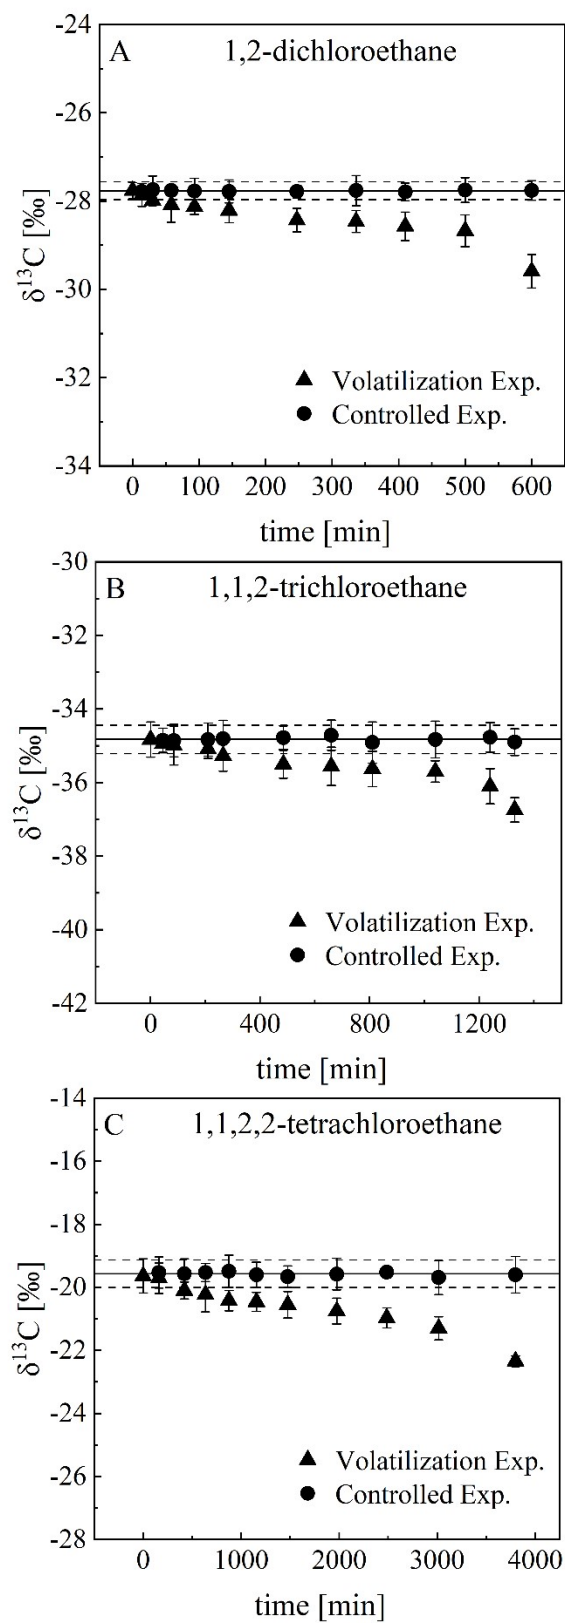

Figure S2. Variations on stable carbon isotope values with time during volatilization of 1,2-dichloroethane (A), 1,1,2-trichloroethane (B) and 1,1,2,2-tetrachloroethane (C).

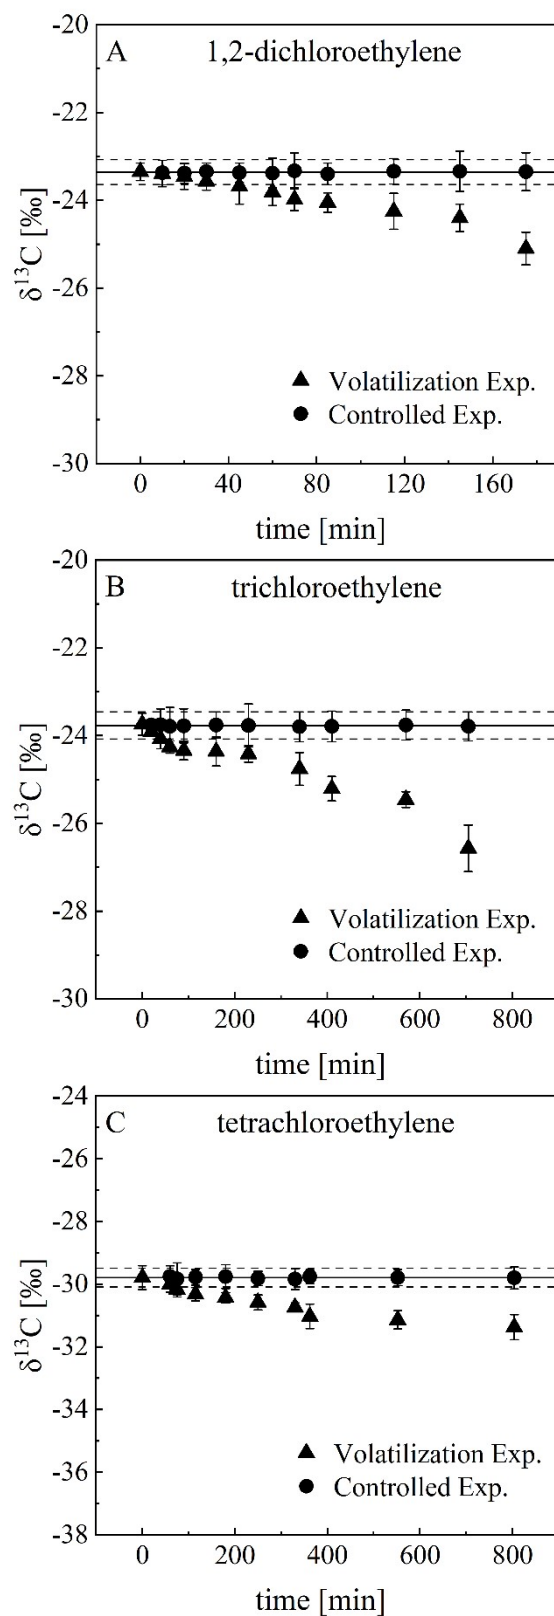

Figure S3. Variations on stable carbon isotope values with time during volatilization of 1,2-dichloroethylene (A), trichloroethylene, (B) and tetrachloroethene (C).

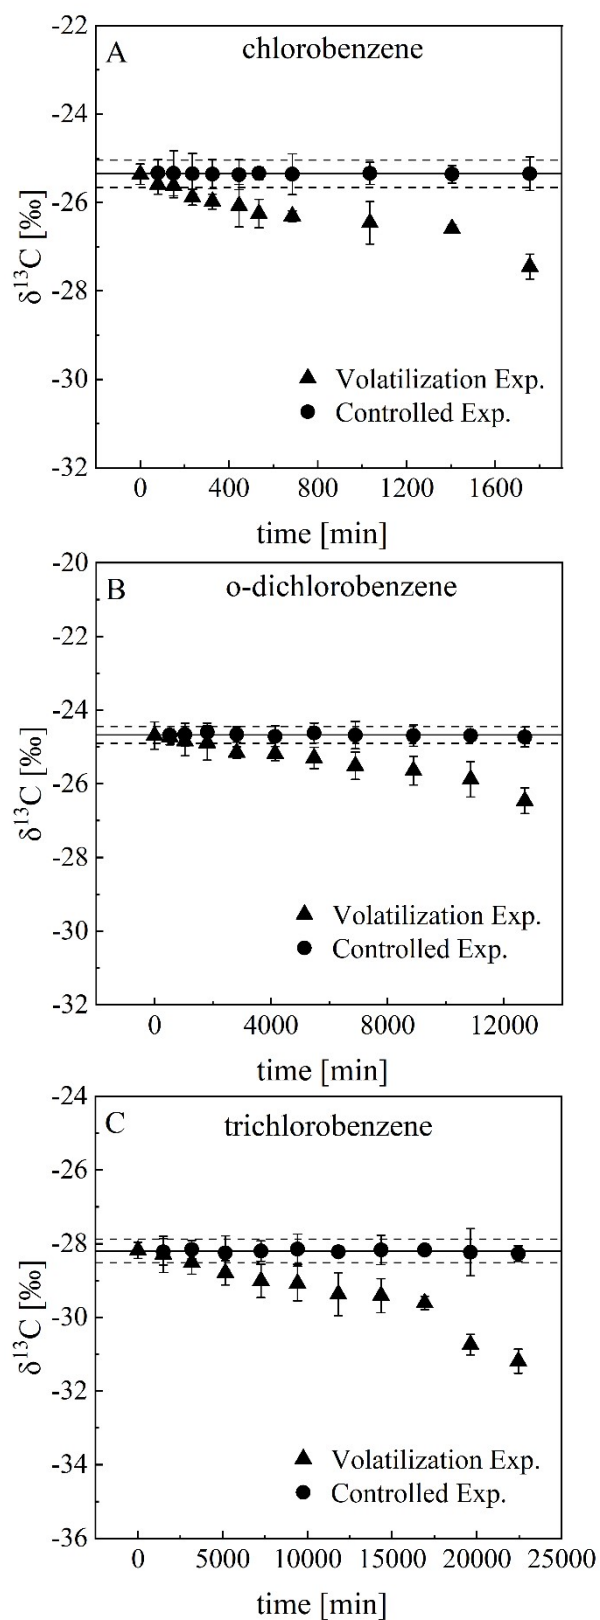

Figure S4. Variations on stable carbon isotope values with time during volatilization of chlorobenzene (A), o-dichlorobenzene (B) and trichlorobenzene (C).
